# Supplementary material
Source: Elsevier journal article supplement (https://www.sciencedirect.com/science/article/pii/S0210569112002471)
Supplement: mmc1 [file S0210569112002471:mmc1.doc]

**APENDICE**

Desde el fallecimiento hasta el inicio de las maniobras de preservación transcurre un periodo de tiempo crítico, que constituye el principal problema para la obtención de órganos de donantes en asistolia. Ello supone la capacidad de respuesta inmediata las 24 horas del día, los 365 días del año26.

El protocolo de donación en muerte cardiaca se activa a partir de la llamada del equipo 061 que ha atendido una parada cardiorrespiratoria extrahospitalaria. En Granada dicho protocolo recibe el nombre clave de "Código Alfa". Supone una cascada progresiva de activación de profesionales sanitarios que forman parte de un equipo de respuesta rápida. El esquema es el siguiente:

El equipo 061 llama al Centro Coordinador de Emergencias alertando de la posibilidad de un donante en asistolia. El médico del Centro Coordinador llama al coordinador médico de trasplantes estableciendo una "conversación a tres" (médico asistencial emergencias-médico coordinador emergencias-coordinador de trasplantes), donde se valora la información, cumplimiento de criterios de inclusión, condiciones y tiempo estimado de traslado al hospital. En caso de que el coordinador de trasplantes acepte al potencial donante, se activa el código alfa. **FIGURA 1.**

El coordinador médico de trasplantes se traslada inmediatamente al H. de Traumatología del H.U. Virgen de las Nieves, mientras realiza dos llamadas: al coordinador de enfermería de trasplantes y al médico intensivista de guardia en la UCI del H. de Traumatología.

El coordinador de enfermería de trasplantes, tras recibir la llamada, se traslada inmediatamente al hospital, mientras realiza cuatro llamadas: al supervisor de guardia, al enfermero del equipo de respuesta rápida de trasplantes y al cirujano vascular. Todos ellos se trasladan de modo inmediato al hospital.

El supervisor de guardia llama al celador encargado de turno y al personal del Servicio de Atención al Usuario.

El celador encargado de turno llama a Seguridad y al celador de puerta de Urgencias.

El equipo de respuesta rápida está formado por cuatro profesionales que se desplazan al hospital en un tiempo inferior a 30 minutos: dos coordinadores de trasplantes, un DUE y un cirujano vascular.

Los coordinadores de trasplantes son: dos coordinadores médicos de trasplantes (uno de ellos coordinador sectorial), ambos intensivistas y adscritos a la UCI del H.U. Virgen de las Nieves, y dos coordinadores de enfermería de trasplantes.

Seis enfermeros del equipo de respuesta rápida, trabajan en UCI, Urgencias, Quirófanos, Unidad Neonatal, con la característica común de que todos han trabajado en algún momento en Cuidados Intensivos.

Cinco cirujanos vasculares. Participan cirujanos vasculares tanto del H. Clínico S. Cecilio como del H.U. Virgen de las Nieves. Forman parte del equipo extractor de segmentos vasculares.

En nuestro protocolo, el potencial donante se traslada directamente por el 061 a la UCI del H. de Traumatología. Por una parte evitamos bloquear el Box de Críticos de Urgencias del H. de Traumatología con un potencial donante, por otra, la UCI de Traumatología dispone de dos camas adicionales, que no tienen personal sanitario asignado, pero que se pueden usar en caso de emergencia. Dado que el personal está localizado y se desplaza para atender al potencial donante, la UCI de Traumatología nos permite tener siempre disponible una cama para el potencial donante.

Durante su estancia en UCI, con una media de tiempo en 2011 inferior a 22 minutos, se realizan las siguientes actividades: evaluación del potencial donante, constatación de la muerte cardiaca según Real Decreto 2070/1999 evidenciando ausencia de pulso y respiración durante un periodo de 5 minutos, canalización de vena subclavia o yugular derecha para obtención de muestras, realización de radiografía de tórax, sondaje nasogástrico y vesical, y envío de fax para solicitud de autorización para inicio de maniobras de preservación al juzgado de guardia.

Una vez certificada la muerte cardiaca, y aceptado definitivamente como potencial donante en asistolia, se traslada a quirófano. El quirófano habitual de extracción es el de Cirugía Plástica en horario de 15:00 a 08:00 y festivos. Si hay actividad de tarde en Cirugía Plástica se utiliza el quirófano de C. Maxilo-Facial. En caso de donación en horario de mañana y día laborable se usa el quirófano de Urgencias. Si no hubiera quirófano disponible temporalmente, se procede a iniciar maniobras de preservación en la UCI.

Los criterios de selección **TABLA 2** y los tiempos límites **FIGURA 2** se deben respetar con el máximo rigor, para garantizar la calidad de los órganos a trasplantar.

La necesidad de un equipo intrahospitalario motivado, y entrenado en maniobras de preservación es una premisa fundamental. Lógicamente hemos tenido que dedicar un tiempo al aprendizaje de material nuevo: cardiocompresor automático, máquinas de by-pass femoro-femoral con hipotermia y oxigenación de membrana, técnica de perfusión renal con solución de preservación e hipotermia, etc. Ello ha supuesto un esfuerzo para conocer el funcionamiento de los aparatos, aprender la técnica y resolver los problemas en su manejo.

En la entrevista familiar, el protocolo dispone que la primera atención a familia se realiza por personal del SAU (Servicio de Atención al Usuario) en Sala de Información de Urgencias. La comunicación del fallecimiento y asistencia del proceso de duelo se hace por el Coordinador de Trasplantes en Sala de Información, y cuando el Equipo de la Coordinación cree que la familia está en una fase de asimilación de nueva información se plantea la solicitud del consentimiento familiar27.

TABLA 2. CRITERIOS ESPECÍFICOS DE INCLUSIÓN-EXCLUSIÓN EN EL DONANTE EN ASISTOLIA.
